# Supplementary material for: Tungsten oxide nanowire clusters anchored on porous carbon fibers as a sulfur redox mediator for lithium–sulfur batteries
Source: Royal Society of Chemistry journal article supplement (doi:10.1039/d4na00829d), 2024-11-24
Supplement: d4na00829d1.pdf [file d4na00829d1.pdf]

## *Supporting Information*

### Tungsten Oxide Nanowire Clusters Anchored on Porous Carbon Fibers as a Sulfur Redox Mediator for Lithium-Sulfur Batteries

Tongzhen Wang,<sup>a</sup> Xiaofei Zhang,<sup>a</sup> Jie Yang,<sup>a</sup> Jiewu Cui,<sup>a</sup> Jian Yan,<sup>a</sup> Jiaqin Liu,<sup>\*b</sup> Yucheng Wu<sup>\*a</sup>

<sup>a</sup> School of Materials Science and Engineering, Hefei University of Technology, Hefei 230009, China

<sup>b</sup> Institute of Industry and Equipment Technology, Research Center of Advanced composite Materials Design & Application of Anhui Province, Key Laboratory of Advanced Functional Materials and Devices of Anhui Province, Hefei University of Technology, Hefei, 230009, China

\* Corresponding authors E-mail addresses: jqliu@hfut.edu.cn; ycwu@hfut.edu.cn;

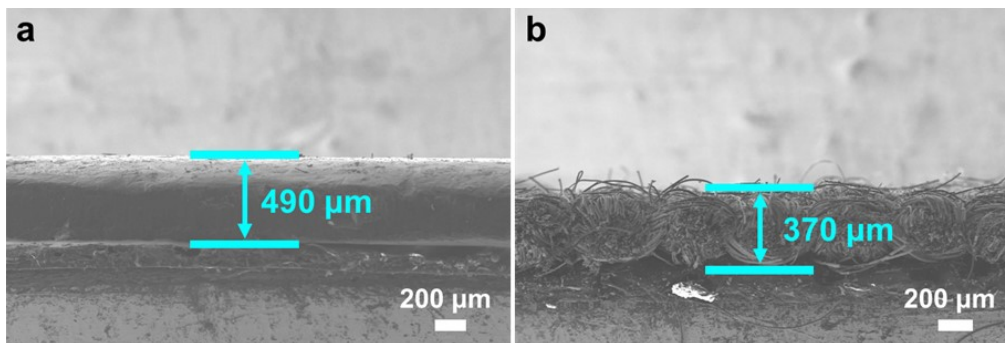

**Fig. S1** SEM images of lithium anode and WO<sub>3</sub>/PCF cathode.

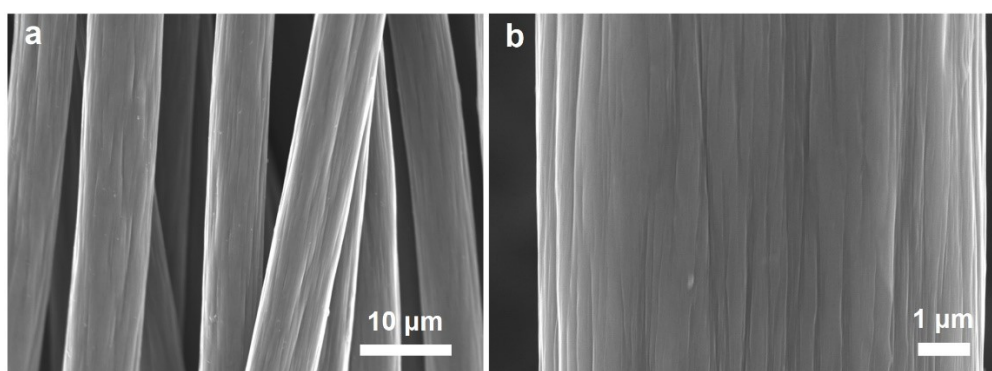

**Fig. S2** SEM images of CF.

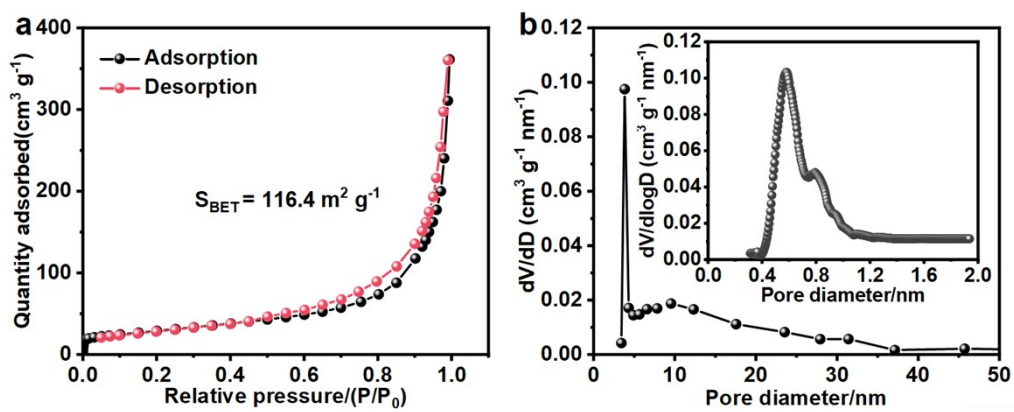

**Fig. S3** N<sub>2</sub> adsorption/desorption isotherms of PCF.

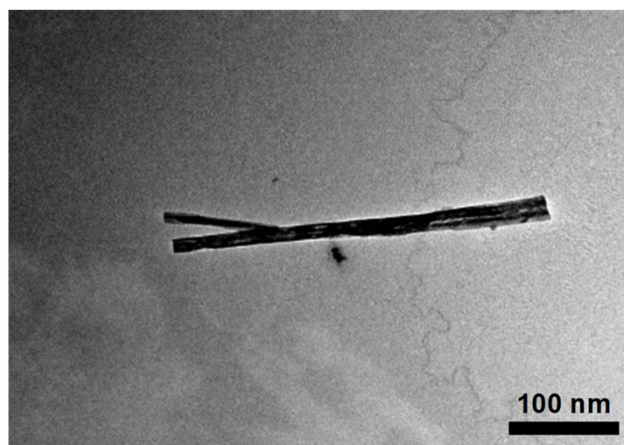

**Fig. S4** TEM image of a single  $\text{WO}_3$  nanowire.

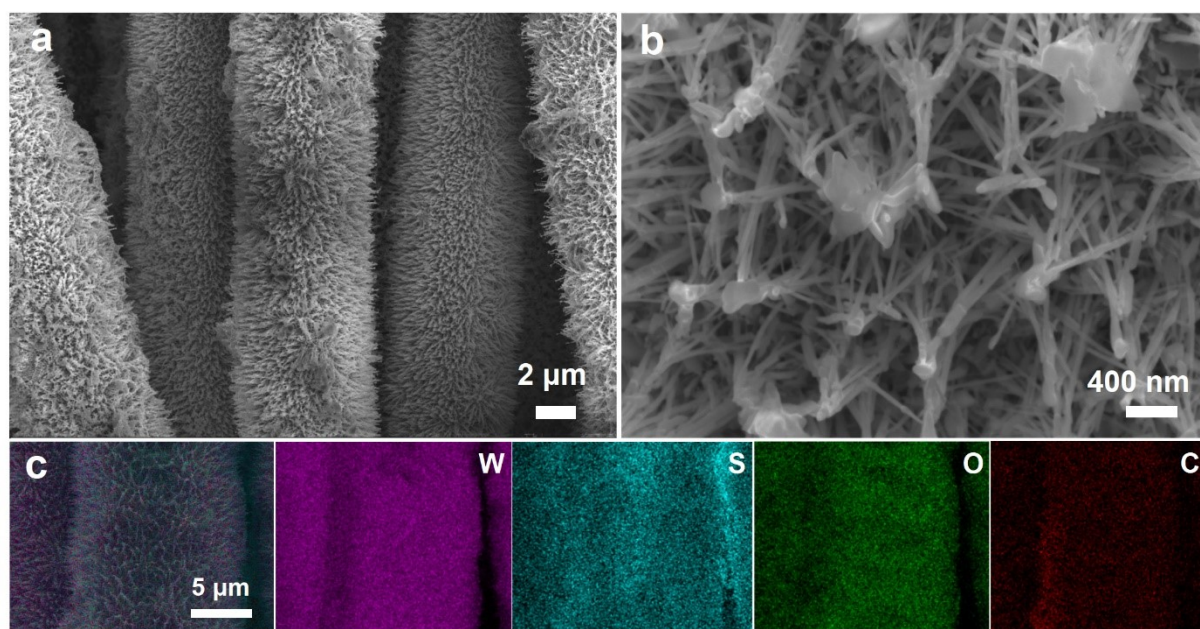

**Fig. S5** SEM images and energy dispersive X-ray spectroscopy elemental mapping of W, S, O and C elements for  $\text{WO}_3/\text{PCF}/\text{S}$ .

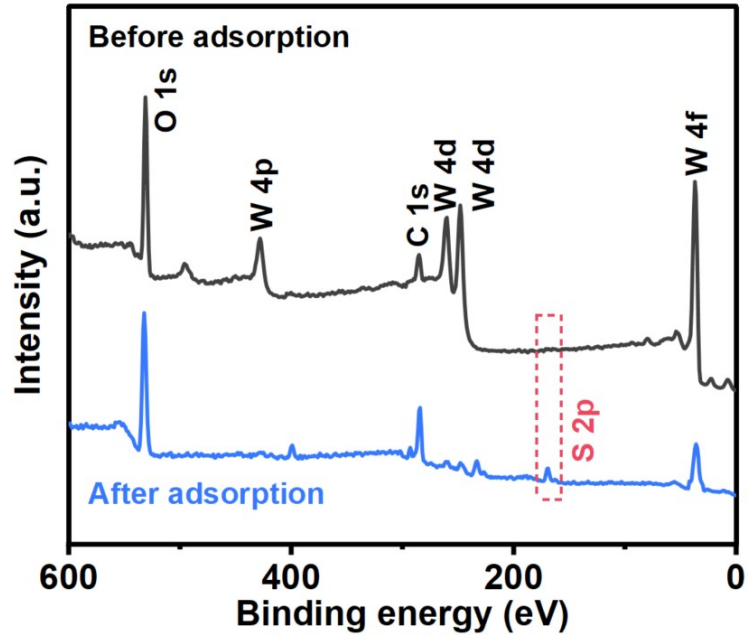

Fig. S6 XPS survey spectra of  $\text{WO}_3/\text{PCF}$  before and after  $\text{Li}_2\text{S}_6$  adsorption.

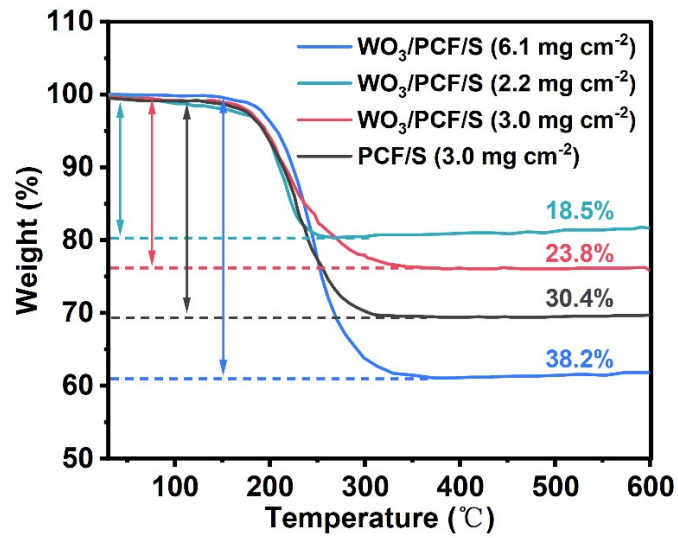

Fig. S7 Thermogravimetry analysis for  $\text{WO}_3/\text{PCF}/\text{S}$  and  $\text{PCF}/\text{S}$ .

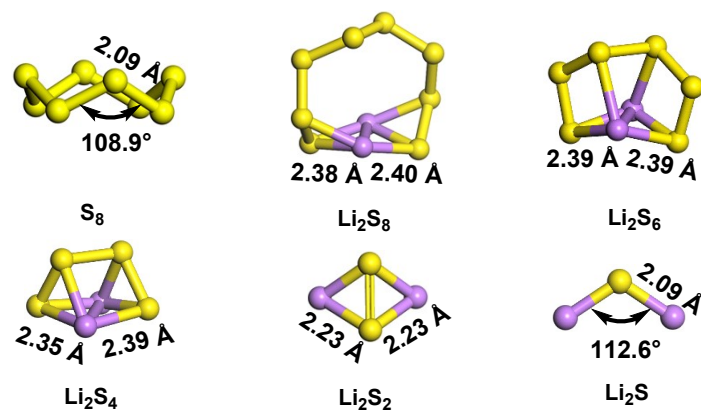

**Fig. S8** Fully optimized geometries and structural parameters of  $S_8$  and  $Li_2S_n$  ( $n = 8, 6, 4, 2, 1$ ).

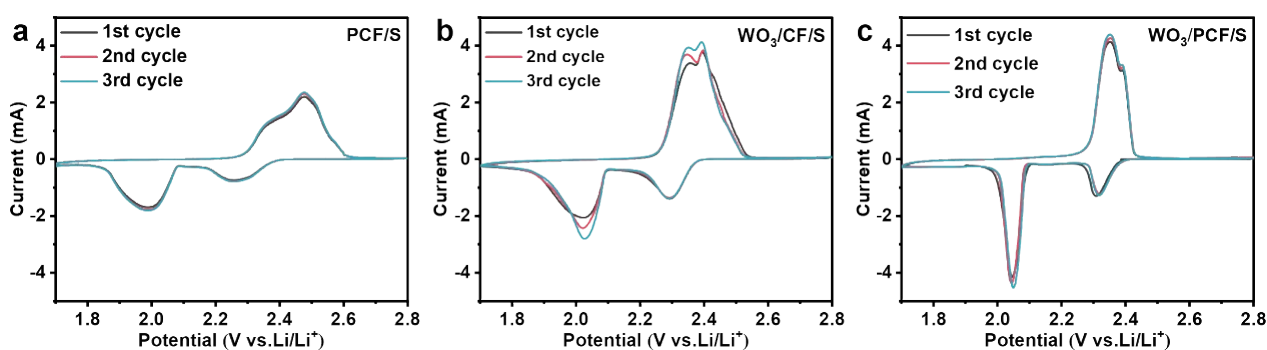

**Fig. S9** CV curves within Li-S cells based on PCF/S,  $WO_3/CF/S$ , and  $WO_3/PCF/S$  cathodes.

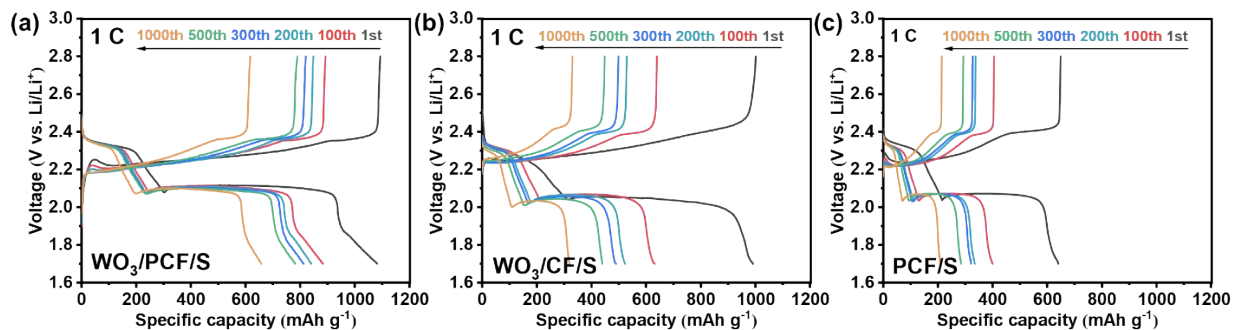

**Fig. S10** Charge-Discharge voltage profiles of Li-S cells based on PCF/S,  $WO_3/CF/S$ , and  $WO_3/PCF/S$  cathodes at 1 C.

**Tab. S1** Impedance fitting results of the  $WO_3/PCF/S$ ,  $WO_3/CF/S$ , and PCF/S cathodes before and after 200 cycles at 1 C.

| Fitted Date    | $WO_3/PCF/S$ |          |       | $WO_3/CF/S$ |          |       | PCF/S |          |       |
|----------------|--------------|----------|-------|-------------|----------|-------|-------|----------|-------|
|                | $R_e$        | $R_{ct}$ | $R_f$ | $R_e$       | $R_{ct}$ | $R_f$ | $R_e$ | $R_{ct}$ | $R_f$ |
| Before cycling | 1.27         | 19.25    | /     | 2.05        | 41.55    | /     | 2.96  | 98.35    | /     |
| After cycling  | 1.25         | 12.90    | 10.71 | 1.87        | 24.30    | 30.38 | 6.76  | 43.17    | 17.56 |

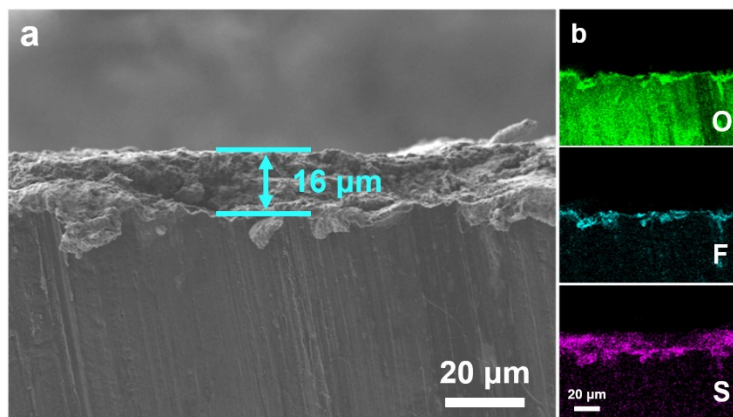

Fig. S11 SEM images and corresponding EDS spectra of cycled Li anode

**Tab. S2** Summary of electrochemical performances of Li-S batteries with different cathodes.

| Sulfur host material                                 | Sulfur loading (mg cm <sup>-2</sup> ) | Rate (C) | Initial capacity (mAh g <sup>-1</sup> ) | Cycled capacity (mAh g <sup>-1</sup> ) | Cycle number (n) | Decay rate per cycle (%) | Rate capacity (mAh g <sup>-1</sup> ) | References |
|------------------------------------------------------|---------------------------------------|----------|-----------------------------------------|----------------------------------------|------------------|--------------------------|--------------------------------------|------------|
| WO <sub>3-x</sub> -W <sub>3</sub> N <sub>4</sub> @CC | 1.3                                   | 1        | 1058.1                                  | /                                      | 400              | 0.128                    | 0.1-2 C<br>2 C:913.9                 | [S1]       |
| NiO-Ni <sub>3</sub> N-AC                             | 1-6                                   | 4        | 681                                     | /                                      | 500              | 0.070                    | 0.2-4 C<br>4 C:652                   | [S2]       |
| NiMoO <sub>4</sub> @NSCC                             | 2                                     | 1        | 681.9                                   | 654.2                                  | 500              | /                        | 0.1-1 C<br>3 C:691.1                 | [S3]       |
| rGO@WO <sub>3</sub>                                  | 2-4.6                                 | 1        | 1017                                    | 847                                    | 200              | 0.090                    | 0.1-3 C<br>3 C:600                   | [28]       |
| NiCoSe/CNS/CC                                        | 1.2                                   | 1        | 1049                                    | 454                                    | 600              | 0.056                    | 0.1-3 C<br>3 C:391                   | [S4]       |
| CC/NiCo <sub>2</sub> O <sub>4</sub>                  | 1.1-1.3                               | 0.5      | 1090                                    | 826                                    | 400              | 0.060                    | 0.1-2 C<br>2 C:624                   | [S5]       |
| NC@H-CeO <sub>2</sub>                                | 3.5                                   | 0.5      | 858                                     | 633                                    | 200              | 0.037                    | 0.2-2 C<br>2 C:523                   | [S6]       |
| CFONC                                                | 4.74                                  | 0.2      | 1096                                    | 681                                    | 500              | 0.076                    | 0.1-2 C<br>2 C:703                   | [S7]       |
| HMC@MoO <sub>2</sub>                                 | 1                                     | 0.5      | 1043                                    | 771                                    | 500              | 0.052                    | 0.1-2 C<br>2 C:700                   | [S8]       |
| CC/HEO                                               | 1.8                                   | 2        | /                                       | /                                      | 1000             | 0.057                    | 0.2-2 C<br>2 C:632.4                 | [S9]       |
| CC/CuCo <sub>2</sub> O <sub>4</sub>                  | 3.5                                   | 0.5      | 997                                     | 776                                    | 600              | 0.037                    | 0.1-3 C<br>3 C:767                   | [S10]      |

|                                     |            |                                  |                                         |                                        |                                           |                                              |                                   |                  |
|-------------------------------------|------------|----------------------------------|-----------------------------------------|----------------------------------------|-------------------------------------------|----------------------------------------------|-----------------------------------|------------------|
| CC/NiCo <sub>2</sub> O <sub>4</sub> | 3.5        | 0.2                              | /                                       | 660                                    | 200                                       | /                                            | 0.1-1 C<br>1 C:552                | [S11]            |
| NiO@HCSs                            | 1-1.2      | 1                                | 692.7                                   | 568.0                                  | 300                                       | 0.060                                        | 0.2-2 C<br>2 C:698.2              | [S12]            |
| CC/NiCoSe <sub>2</sub> -NiO         | 1.55       | 1                                | 979.1                                   | 606                                    | 1000                                      | 0.038                                        | 0.1-2 C<br>2 C:776                | [S13]            |
| WO <sub>3</sub> /PCF                | <b>3.0</b> | <b>1</b><br><b>2</b><br><b>5</b> | <b>1082</b><br><b>968</b><br><b>862</b> | <b>663</b><br><b>489</b><br><b>364</b> | <b>1000</b><br><b>1000</b><br><b>1000</b> | <b>0.039</b><br><b>0.049</b><br><b>0.058</b> | <b>0.2-5 C</b><br><b>5 C: 672</b> | <b>This work</b> |

## References

- [S1] D. Zhang, T. F. Duan, Y. X. Luo, S. S. Liu, W. Q. Zhang, Y. Q. He, K. Zhu, L. Huang, Y. Yang, R. Z. Yu, X. K. Yang, H. B. Shu, Y. Pei, X. Y. Wang and M. F. Chen, *Adv. Funct. Mater.*, 2023, **33**, 2306578.
- [S2] J. Pu, Z. H. Wang, P. Xue, K. P. Zhu, J. C. Li and Y. G. Yao, *J. Energy Chem.*, 2022, **68**, 762-770.
- [S3] T. T. Sun, X. M. Zhao, B. Li, H. B. Shu, L. P. Luo, W. L. Xia, M. F. Chen, P. Zeng, X. K. Yang, P. Gao, Y. Pei and X. Y. Wang, *Adv. Funct. Mater.*, 2021, **31**, 2101285.
- [28] L. B. Ni, S. Q. Duan, H. Y. Zhang, J. Gu, G. J. Zhao, Z. X. Lv, G. Yang, Z. Y. Ma, Y. Liu, Y. S. Fu, Z. Wu, J. Xie, M. Chen and G. W. Diao, *Carbon*, 2021, **182**, 335-347.
- [S4] H. Wang, H. Su, H. L. Guo, M. Z. Yang, W. L. Liu, J. S. Yao, M. M. Ren and Y. H. Wang, *J. Electrochem. Soc.*, 2023, **170**, 060504.
- [S5] J. L. Zhou, X. L. Yang, Y. J. Zhang, J. Z. Jia, X. J. He, L. Yu, Y. D. Pan, J. W. Liao, M. Sun and J. He, *Nanoscale Adv.*, 2021, **3**, 1690-1698.



- [S6] W. T. Qi, W. Jiang, F. Xu, J. B. Jia, C. Yang and B. Q. Cao, *Chem. Eng. J.*, 2020, **382**, 122852.
- [S7] C. J. Zhang, Y. P. He, Y. Q. Wang, Y. Z. Liang, A. Majeed, Z. L. Yang, S. S. Yao, X. Q. Shen, T. B. Li and S. B. Qin, *Appl. Surf. Sci.*, 2021, **560**, 149908.
- [S8] X. Q. Hu, K. M. Shen, C. Han, X. Wu, S. D. Li, J. Guo, M. Y. Yan and M. G. Zhang, *Colloid. Surface. A*, 2023, **660**, 130881.
- [S9] Y. J. Ma, H. R. Ji, C. Wang, H. F. Bian, H. Wu, Y. L. Ren, B. Wang, J. D. Cao, X. Y. Cao, F. Ding, J. H. Lu, X. P. Yang and X. K. Meng, *Langmuir*, 2024, **40**, 11626-11634.
- [S10] Y. N. Li, D. Liu, Y. Tian and C. Wang, *Chem. Commun.*, 2024, **60**, 1273-1276.
- [S11] S. J. Chen, J. X. Zhang, Z. Y. Wang, L. Nie, X. C. Hu, Y. Yu and W. Liu, *Nano Lett.*, 2021, **21**, 5285-5292.
- [S12] Y. J. Wu, D. Li, J. D. Pan, Y. J. Sun, W. Z. Huang, M. Wu, B. K. Zhang, F. Pan, K. X. Shi and Q. B. Liu, *J. Mater. Chem. A*, 2022, **10**, 16309-1631.
- [S13] T. T. Li, K. G. Liu, S. Wang, Z. H. Liu, G. Z. Liao, Z. Y. Chen and P. K. Shen, *J. Colloid Interf. Sci.*, 2023, **629**, 114-124.
